# Supplementary material
Source: publisher figshare collection journal article supplement (https://karger.figshare.com/ndownloader/files/27670995)
Supplement: Supplementary file 1 [file 27670995]

**Supplementary Tables S1-S14**

Please contact [nen@karger.com](mailto:nen@karger.com) should you wish to gain access to these large data spreadsheets.

Thank you

Editorial Office
